# Supplementary material for: Circulating T Cells Exhibit Different TIM3/Galectin-9 Expression in Patients with Obesity and Obesity-Related Diabetes
Source: Hindawi journal article supplement (doi:10.1155/2020/2583257), 2020-10-15
Supplement: f1 [file 2583257.f1.pdf]

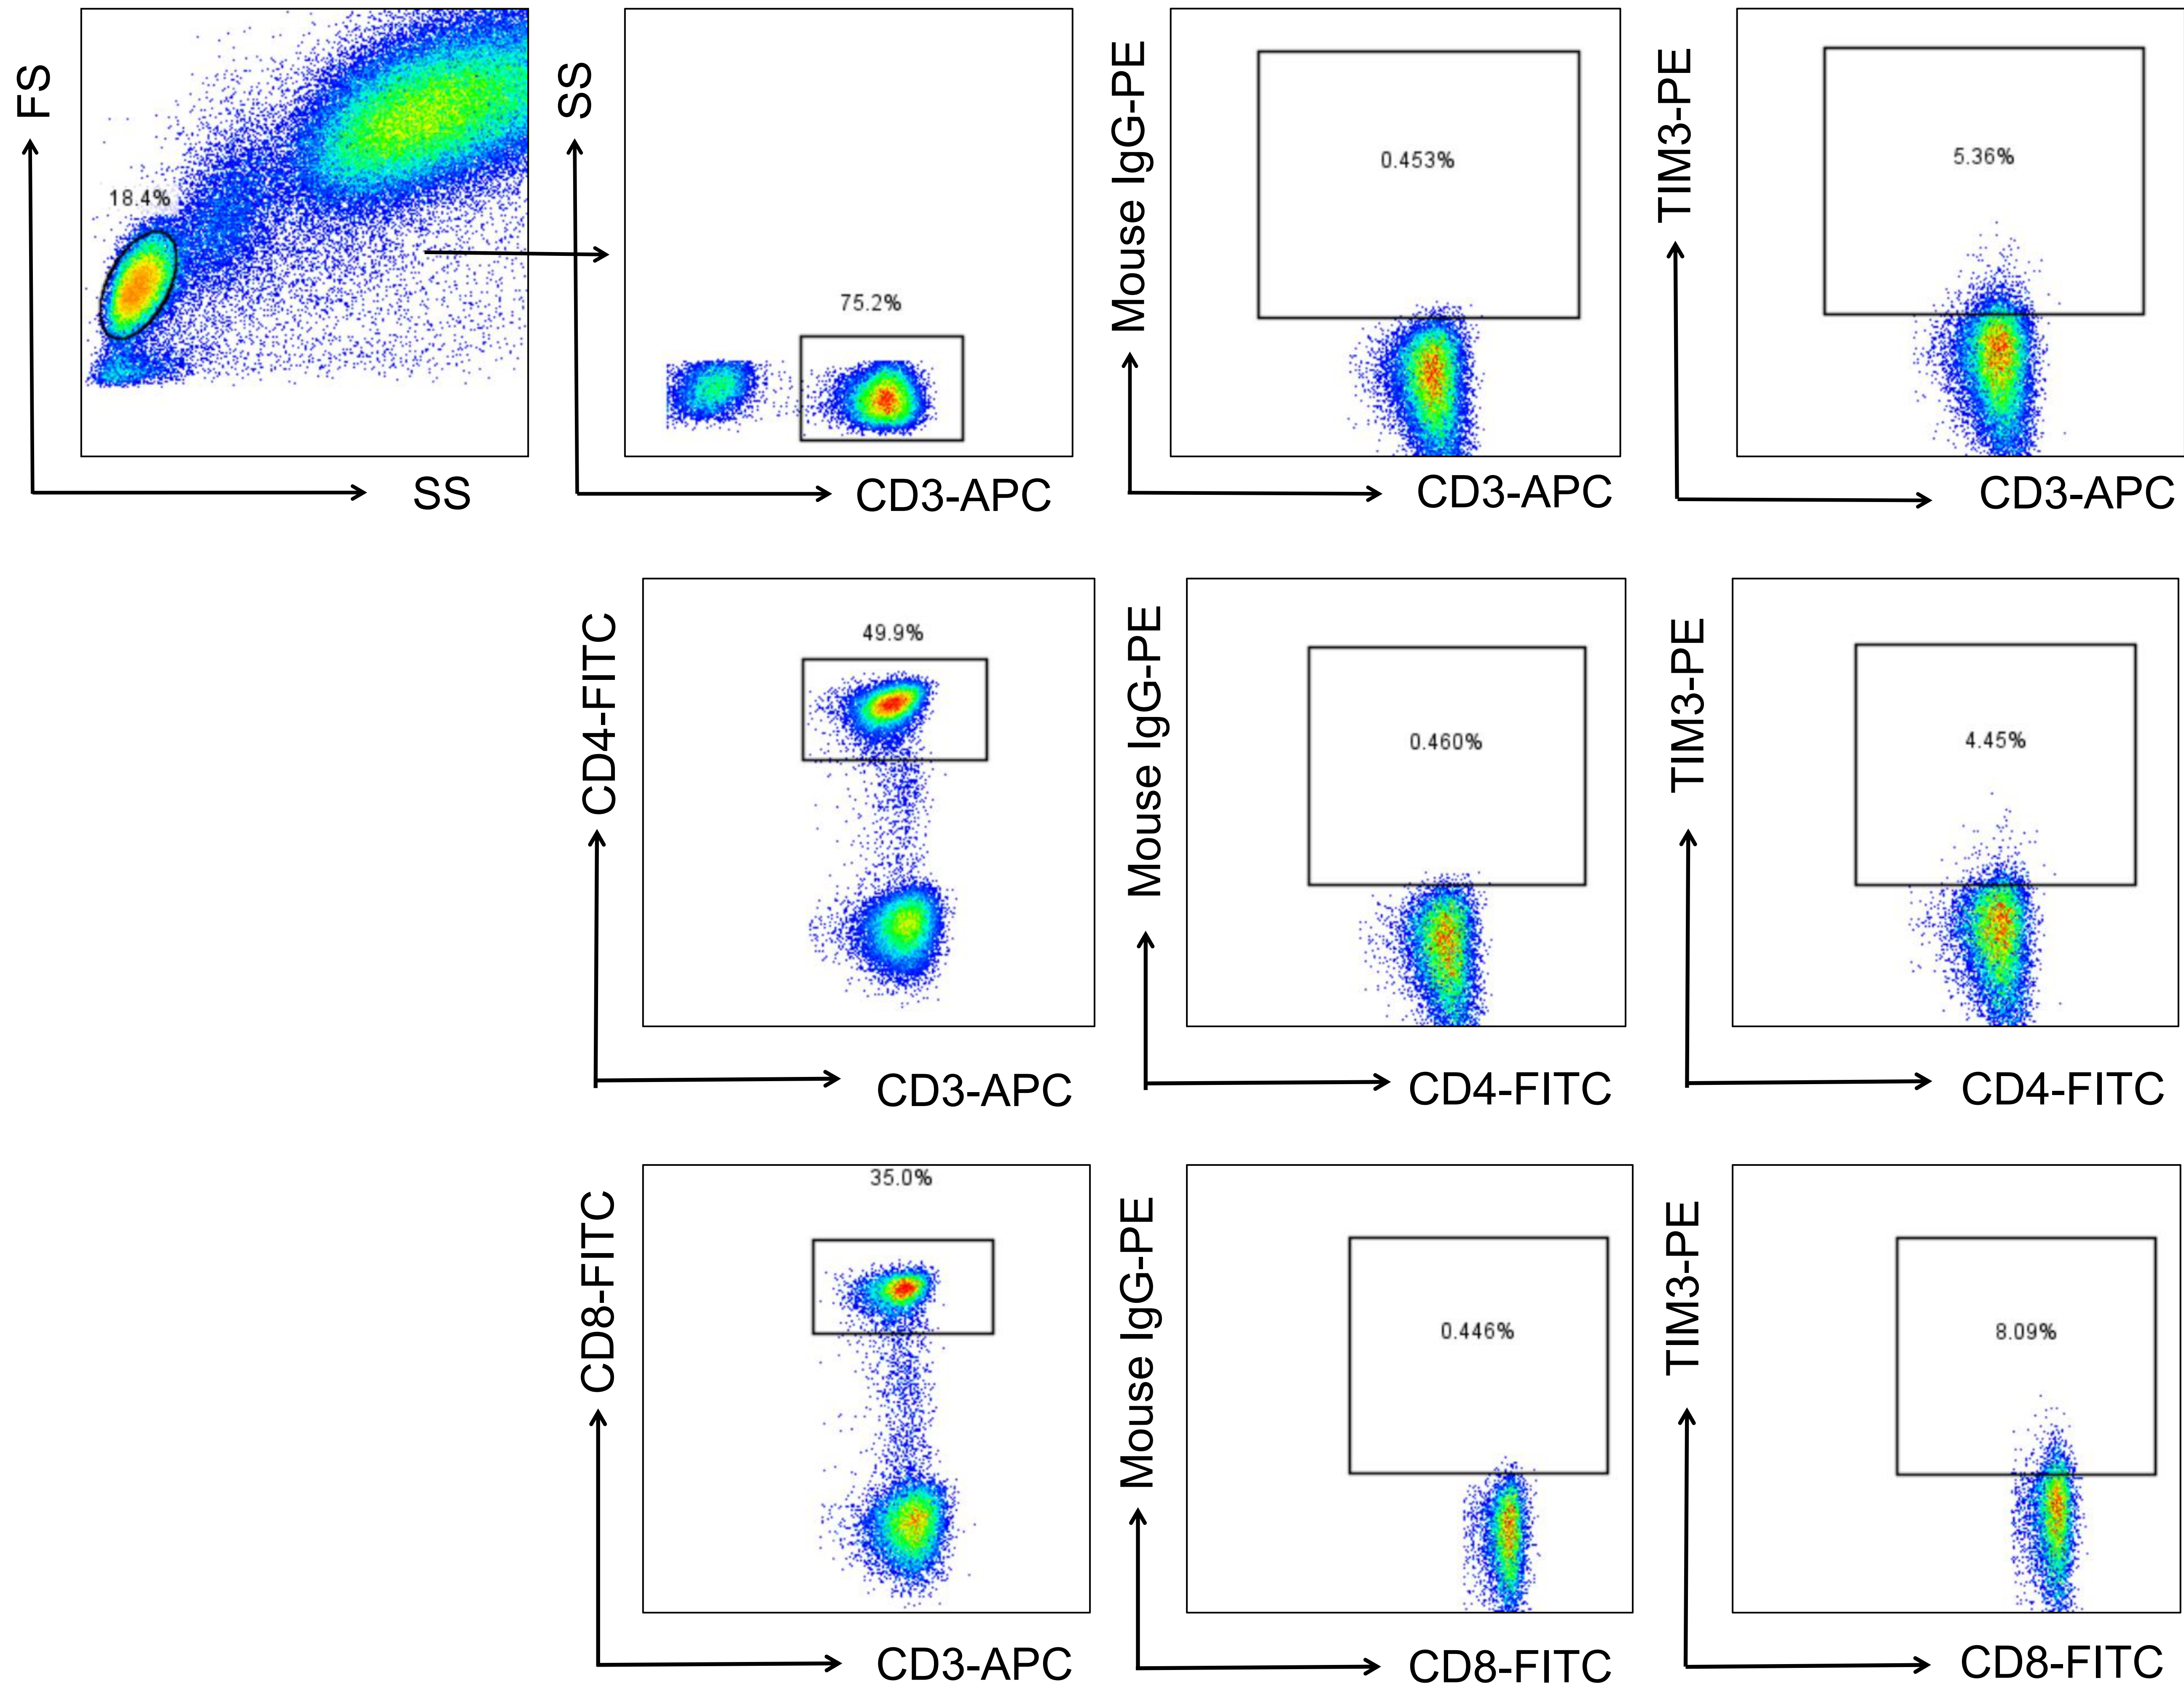

Figure. S1. Gating strategy in flow cytometry analysis.
